# Supplementary material
Source: MDPI journal article supplement (https://www.mdpi.com/2624-8549/4/4/103)
Supplement: s1 [file s1]

# Supporting Information

## Effects of Carboxyl Functionalized CNT on Electrochemical Behaviour of Polyluminol-CNT Composites

Raunaq Bagchi <sup>1,\*</sup>, Mohamed Elshazly <sup>1,2</sup>, Jeanne N'Diaye <sup>3</sup>, Dian Yu <sup>1</sup>, Jane Y. Howe <sup>1</sup> and Keryn Lian <sup>2,\*</sup>

<sup>1</sup> Department of Materials Science and Engineering, University of Toronto, Toronto, ON M5S3E4, Canada

<sup>2</sup> The Edward S. Rogers Sr. Department of Electrical & Computer Engineering, University of Toronto, 10 King's College Road, Toronto, ON M5S 3G4, Canada

<sup>3</sup> Beckman Institute for Advanced Science and Technology, University of Illinois at Urbana-Champaign, 405 N Mathews Ave, Urbana, IL 61801, USA

\* Correspondence: r.bagchi@mail.utoronto.ca (R.B.); keryn.lian@utoronto.ca (K.L.)

## Supplementary Figures and Tables

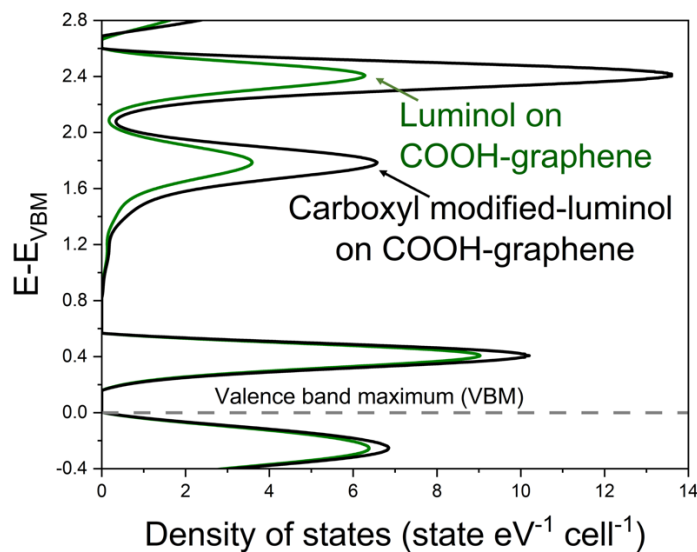

**Figure S1.** A comparison between the pDOS of luminol and carboxyl modified-luminol adsorbed to COOH-graphene.

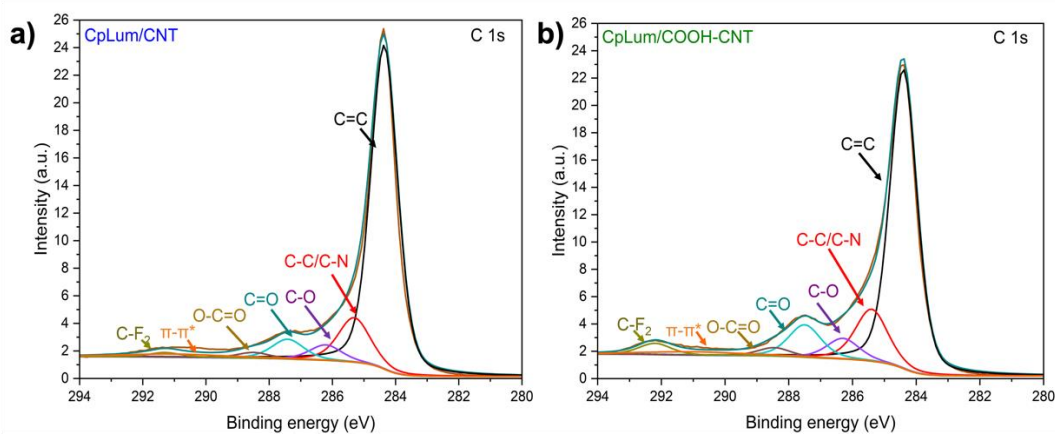

**Figure S2.** High-resolution C 1s spectra of a) CpLum/CNT and b) CpLum/COOH-CNT.

**Table S1.** Bonding group percentages in CpLum/CNT and CpLum/COOH-CNT

| Element | Peaks (eV)                 | CpLum/CNT [%] | CpLum/COOH-CNT [%] |
|---------|----------------------------|---------------|--------------------|
| C 1s    | 284.4 (C=C)                | 60.1 ±6.5     | 60.9 ±8.0          |
|         | 285.4 (C-C/C-N)            | 11.8 ±0.4     | 10.1 ±1.3          |
|         | 286.3 (C-O)                | 4.1 ±0.5      | 4.6 ±0.4           |
|         | 287.5 (C=O)                | 6.2 ±1.4      | 5.5 ±1.9           |
|         | 288.5 (O-C=O)              | 1.8 ±0.5      | 2.3 ±0.8           |
| O 1s    | 531.2 (O=C <sub>Q</sub> )  | 2.1 ±0.6      | 2.6 ±0.9           |
|         | 532.7 (O=C <sub>Bz</sub> ) | 2.9 ±1.1      | 3.3 ±0.9           |
|         | 533.5 (O=C-QH)             | 0.9 ±0.3      | 0.8 ±0.3           |
| N 1s    | 399 (=N-Q)                 | 2.7 ±0.9      | 1.9 ±0.9           |
|         | 399.8 (HN-Bz)              | 6.1 ±1.6      | 6.6 ±2.0           |
|         | 400.6 (O=C-NH)             | 1.4 ±0.7      | 1.5 ±0.1           |

**Table S2.** Summary of total charge storage at 15 mV s<sup>-1</sup> and 100 mV s<sup>-1</sup>

| Scan rate<br>(mV s <sup>-1</sup> ) | Charge (C cm <sup>-3</sup> ) |             |            |                |
|------------------------------------|------------------------------|-------------|------------|----------------|
|                                    | CNT                          | CpLum/CNT   | COOH-CNT   | CpLum/COOH-CNT |
| 15                                 | 50.9 ±1.9                    | 104.1 ±18.6 | 64.4 ±12.7 | 137.1 ±17.1    |
| 100                                | 45.8 ±2.8                    | 86.2 ±14.1  | 54.3 ±11.6 | 116.1 ±14.2    |

**Table S3.** b-values for CpLum/CNT and CpLum/COOH-CNT

| Composite      | b-value    |            |
|----------------|------------|------------|
|                | Anodic     | Cathodic   |
| CpLum/CNT      | 0.83 ±0.02 | 0.84 ±0.02 |
| CpLum/COOH-CNT | 0.85 ±0.01 | 0.86 ±0.02 |
